# Supplementary material
Source: PubMed Central journal article supplement (PMC7788266)
Supplement: NIHMS1659241-supplement-supplemental_material.pdf [file NIHMS1659241-supplement-supplemental_material.pdf]

# THE LANCET Psychiatry

## Supplementary appendix

This appendix formed part of the original submission and has been peer reviewed. We post it as supplied by the authors.

Supplement to: Service SK, Upegui CV, Ramírez MC, et al. Distinct and shared contributions of diagnosis and symptom domains to cognitive performance in severe mental illness in the Paisa population: a case-control study. *Lancet Psychiatry* 2020; **7**: 411–19.

**Appendix: Table of Contents**

| <b>Description</b>                                                                                                                                                                                                                                                                                                            | <b>Page</b> |
|-------------------------------------------------------------------------------------------------------------------------------------------------------------------------------------------------------------------------------------------------------------------------------------------------------------------------------|-------------|
| Supplementary Figure 1. Flowchart of participant recruitment                                                                                                                                                                                                                                                                  | 1           |
| Supplementary Table 1. Summary of missing data for variables analysed in 1689 cases and 717 controls                                                                                                                                                                                                                          | 2           |
| Supplementary Table 2. Description of tests employed in the Penn CNB                                                                                                                                                                                                                                                          | 3           |
| Supplementary Table 3. Medication use in cases                                                                                                                                                                                                                                                                                | 4           |
| Supplementary Table 4. Breakdown of reasons for missing CNB data                                                                                                                                                                                                                                                              | 5           |
| Supplementary Figure 2. Schematic of linear mixed model analysis procedures and overview of results                                                                                                                                                                                                                           | 6           |
| Supplementary Table 5A. Analysis of accuracy and speed as a function of diagnosis, sex, domain, and interactions among main effects.                                                                                                                                                                                          | 7           |
| Supplementary Table 5B. Analysis of accuracy and speed as a function of diagnosis, sex, domain, interactions among these main effects, and medication use.                                                                                                                                                                    | 7           |
| Supplementary Table 5C. Analysis of accuracy and speed as a function of diagnosis, sex, domain, interactions among these main effects, and scores on three symptom factors.                                                                                                                                                   | 7           |
| Supplementary Figure 3. Z-scores on Accuracy (top) and Speed (bottom) profiles for tests assessing Executive Function, Memory, (Complex) Cognition, Social Cognition, and Motor Speed.                                                                                                                                        | 8           |
| Supplementary Figure 4. Symptom endorsement by diagnosis for 21 binary symptoms endorsed by at least 2.5% of cases overall.                                                                                                                                                                                                   | 9           |
| Supplementary Figure 5. Factor loadings on 21 binary symptoms in the three-factor model.                                                                                                                                                                                                                                      | 10          |
| Supplementary Table 6. Uniqueness for each symptom from the 3-factor solution.                                                                                                                                                                                                                                                | 11          |
| Supplementary Figure 6. Distribution of scores on factors, by diagnosis                                                                                                                                                                                                                                                       | 12          |
| Supplementary Table 7. Comparison of regression coefficients for Psychosis and Depression factor scores in imputed and non-imputed symptom data.                                                                                                                                                                              | 13          |
| Supplementary Table 8. Analyses by diagnosis, split by median score on Psychosis or Depression, for CNB tests that are most significant in Table 3                                                                                                                                                                            | 14          |
| Supplementary Table 9. Relationship between WAT, quantile-normal transformed number of hospitalizations and ER visits, or SA45 global severity index, duration of illness (in years since first visit), and Factor Scores or DX.                                                                                              | 15          |
| Supplementary Table 10A: Analysis of accuracy and speed as a function of diagnosis, sex, domain, interactions among these main effects, scores on three symptom factors and score on the WAT.                                                                                                                                 | 16          |
| Supplementary Table 10B: Analysis of accuracy and speed as a function of diagnosis, sex, domain, interactions among these main effects, scores on three symptom factors, duration of illness, current symptom severity from the SA45, and number of hospitalizations and ER visits recorded in the electronic medical record. | 16          |
| Supplementary Figure 7. Z-scores on Accuracy (top) and Speed (bottom) profiles for tests assessing Executive Function, Memory, (Complex) Cognition, Social Cognition, and Motor Speed, stratified by Psychosis factor scores.                                                                                                 | 17          |
| Supplementary Figure 8. Z-scores on Accuracy (top) and Speed (bottom) profiles for tests assessing Executive Function, Memory, (Complex) Cognition, Social Cognition, and Motor Speed, stratified by Depression factor scores.                                                                                                | 18          |

**Controls:** potentially eligible N=1,699

**Cases:** potentially eligible N=14,578

Not eligible;  
Non-Paisa surnames: n=679 controls; 3,147 cases  
Non-eligible DX: n=151 controls; n=4,623 cases  
Non-severe mental illness: n=3,082 cases

No phone contact (3 attempts); n=538 cases

Declined to participate; n=269 cases

Incomplete assessment;  
n=68 controls; 253 cases

No CNB;  
n=66 controls; 672 cases

Invalid CNB;  
n=18 controls; 145 cases

Non-target DX;  
n=160 cases

N=869

N=801

N=735

**Analyzed: N=717**

N=3,726

N=3,188

N=2,919

N=2,666

N=1,994

N=1,849

**Analyzed: N=1,689**

**Supplementary Figure 1. Flow chart of participant recruitment.** Incomplete assessment: enrolled, but interview/assessments not yet finished. No CNB: participants were unable to complete CNB due to fatigue, problems with computer use, or mental state (See page 5 for details). Invalid CNB: CNB was attempted, but participant was unable to do assessment without help. Non-target DX: case participants with DX other than schizophrenia, bipolar-I, bipolar-II, or major depressive disorder

**Supplementary Table 1. Summary of missing data for variables analysed in 1,689 cases and 717 controls**

| Category                                               | Variable                                 | Quantitative or Categorical | Outcome or predictor | N Missing Case | N Missing Control |
|--------------------------------------------------------|------------------------------------------|-----------------------------|----------------------|----------------|-------------------|
| Penn CNB Speed; see Supplementary Table 2 for detail   | SM                                       |                             |                      | 41             | 8                 |
|                                                        | EDI                                      |                             |                      | 51             | 9                 |
|                                                        | EID                                      |                             |                      | 71             | 13                |
|                                                        | WM                                       |                             |                      | 195            | 34                |
|                                                        | FMEM                                     | Quantitative                | Outcome              | 61             | 13                |
|                                                        | AM                                       |                             |                      | 194            | 27                |
|                                                        | PS                                       |                             |                      | 194            | 27                |
|                                                        | ATT                                      |                             |                      | 163            | 17                |
|                                                        | NVR                                      |                             |                      | 247            | 42                |
| Penn CNB Accuracy see Supplementary Table 2 for detail | EDI                                      |                             |                      | 51             | 9                 |
|                                                        | EID                                      |                             |                      | 71             | 13                |
|                                                        | WM                                       |                             |                      | 194            | 34                |
|                                                        | FMEM                                     | Quantitative                | Outcome              | 61             | 13                |
|                                                        | AM                                       |                             |                      | 194            | 27                |
|                                                        | PS                                       |                             |                      | 194            | 27                |
|                                                        | ATT                                      |                             |                      | 162            | 16                |
|                                                        | NVR                                      |                             |                      | 218            | 35                |
| Symptom                                                | Auditory Hallucinations                  |                             |                      | 15             |                   |
|                                                        | Delusion of Being Controlled             |                             |                      | 30             |                   |
|                                                        | Visual Hallucinations                    |                             |                      | 34             |                   |
|                                                        | Bizarre Delusion                         |                             |                      | 27             |                   |
|                                                        | Tactile Hallucinations                   |                             |                      | 28             |                   |
|                                                        | Delusion of Reference                    |                             |                      | 32             |                   |
|                                                        | Persecutory Delusion                     |                             |                      | 13             |                   |
|                                                        | Grossly Disorganized Behavior            |                             |                      | 16             |                   |
|                                                        | Other Delusions                          |                             |                      | 33             |                   |
|                                                        | Disorganized Speech                      |                             |                      | 14             |                   |
|                                                        | Religious Delusion                       | Categorical                 | Predictor            | 23             | NA                |
|                                                        | Suicidal thoughts lifetime               |                             |                      | 24             |                   |
|                                                        | Suicide attempt                          |                             |                      | 22             |                   |
|                                                        | Depressed Mood                           |                             |                      | 1              |                   |
|                                                        | Anhedonia                                |                             |                      | 74             |                   |
|                                                        | Fatigue                                  |                             |                      | 127            |                   |
|                                                        | Hypersomnia                              |                             |                      | 127            |                   |
|                                                        | Flight of Ideas                          |                             |                      | 214            |                   |
| Decreased Need for Sleep                               |                                          |                             | 207                  |                |                   |
|                                                        | Grandiosity                              |                             |                      | 96             |                   |
|                                                        | Avolition                                |                             |                      | 2              |                   |
| Factor Scores                                          | Psychosis                                |                             |                      | 0              |                   |
|                                                        | Depression                               | Quantitative                | Predictor            | 0              | NA                |
|                                                        | Mania                                    |                             |                      | 0              |                   |
| pre-morbid IQ                                          | WAT                                      | Quantitative                | Predictor            | 7              | 2                 |
| disease severity                                       | number of hospitalizations and ER visits | Quantitative                | Predictor            | 359            | NA                |
| current symptom severity                               | SA-45                                    | Quantitative                | Predictor            | 90             | 46                |

**Supplementary Table 2. Description of tests employed in the Penn CNB**

| <b>Test</b>                                | <b>Description</b>                                                                                                                                                | <b>Abbreviation</b> | <b>RDoC Domain</b>   |
|--------------------------------------------|-------------------------------------------------------------------------------------------------------------------------------------------------------------------|---------------------|----------------------|
| Motor Praxis                               | 40 total trials, including 20 test trials, to measure ability to control a computer mouse                                                                         | <b>SM</b>           | Sensorimotor         |
| Measured Emotion Intensity Differentiation | 36 paired faces varying in intensity to evaluate participant's ability for intensity differentiation as part of social cognition function                         | <b>EDI</b>          | Social Communication |
| Penn Emotion Identification                | 40 faces presented with emotions that range from mild to extreme intensity that participants have to identify to evaluate social cognition function               | <b>EID</b>          |                      |
| Short Letter-N-Back                        | 90 total stimuli to assess participant's working memory as part of executive functioning                                                                          | <b>WM</b>           | Working Memory       |
| Penn Face Memory                           | 20 faces to memorize one at a time to assess episodic memory function                                                                                             | <b>FMEM</b>         | Declarative Memory   |
| Digit Symbol                               | numbers paired with symbols to assess participant's speed of information processing domain (Processing Speed) as well as incidental learning (Associative Memory) | <b>AM</b>           |                      |
|                                            |                                                                                                                                                                   | <b>PS</b>           | Attention            |
| Short Penn Continuous Performance          | 180 total trials including 90 number and 90 letter trials to assess participant's Attention as part of executive function                                         | <b>ATT</b>          |                      |
| Penn Matrix Analysis                       | 24 items with increasing difficulty to evaluate participant's complex cognition                                                                                   | <b>NVR</b>          | Global IQ            |

**Supplementary Table 3. Cases were asked about their current use of the following medications.** They were grouped into Antidepressants, Antipsychotics, and Mood Stabilizers for analysis; a 1 in a column indicates the group to which the medication belongs. N=number of patients who report currently taking the medication

| <b>Drug</b>       | <b>N</b> | <b>Antidepressant</b> | <b>Antipsychotic</b> | <b>Mood Stabilizer</b> |
|-------------------|----------|-----------------------|----------------------|------------------------|
| Valproic Acid     | 487      | 0                     | 0                    | 1                      |
| Agomelatine       | 55       | 1                     | 0                    | 0                      |
| Amisulpride       | 39       | 0                     | 1                    | 0                      |
| Amitriptyline     | 18       | 1                     | 0                    | 0                      |
| Aripiprazole      | 40       | 0                     | 1                    | 0                      |
| Asenapine         | 1        | 0                     | 1                    | 0                      |
| Bupropion         | 33       | 1                     | 0                    | 0                      |
| Carbamazepine     | 20       | 0                     | 0                    | 1                      |
| Lithium Carbonate | 175      | 0                     | 0                    | 1                      |
| Clomipramine      | 2        | 1                     | 0                    | 0                      |
| Clozapine         | 135      | 0                     | 1                    | 0                      |
| Desvenlafaxine    | 11       | 1                     | 0                    | 0                      |
| Duloxetine        | 29       | 1                     | 0                    | 0                      |
| Escitalopram      | 204      | 1                     | 0                    | 0                      |
| Fluoxetine        | 146      | 1                     | 0                    | 0                      |
| Fluvoxamine       | 36       | 1                     | 0                    | 0                      |
| Haloperidol       | 8        | 0                     | 1                    | 0                      |
| Lamotrigine       | 38       | 0                     | 0                    | 1                      |
| Levomepromazine   | 68       | 0                     | 1                    | 0                      |
| Mirtazapine       | 9        | 1                     | 0                    | 0                      |
| Olanzapine        | 85       | 0                     | 1                    | 0                      |
| Paliperidone      | 3        | 0                     | 1                    | 0                      |
| Paroxetine        | 15       | 1                     | 0                    | 0                      |
| Pipotiazine       | 8        | 0                     | 1                    | 0                      |
| Quetiapine        | 447      | 0                     | 1                    | 0                      |
| Risperidone       | 180      | 0                     | 1                    | 0                      |
| Sertraline        | 263      | 1                     | 0                    | 0                      |
| Trazodone*        | 184      | 1                     | 0                    | 0                      |
| Venlafaxine       | 39       | 1                     | 0                    | 0                      |
| Vortioxetine      | 2        | 1                     | 0                    | 0                      |

\*only doses in excess of 300mg were classified as antidepressants

**Supplementary Table 4. Breakdown of reasons for missing CNB data.**

| <b>Reason</b>                                              | <b>N Cases</b> | <b>% Cases<br/>Missing Data</b> | <b>N Controls</b> | <b>% Controls<br/>Missing Data</b> |
|------------------------------------------------------------|----------------|---------------------------------|-------------------|------------------------------------|
| Invalid CNB*                                               | 145            | 17.75%                          | 18                | 21.43%                             |
| Lack of computer skills                                    | 194            | 23.75%                          | 23                | 27.38%                             |
| Physical limitations**                                     | 130            | 15.91%                          | 11                | 13.10%                             |
| Symptomatic                                                | 105            | 12.85%                          | 0                 | 0.00%                              |
| Illiterate                                                 | 45             | 5.51%                           | 4                 | 4.76%                              |
| Cognitive Impairment                                       | 33             | 4.04%                           | 0                 | 0.00%                              |
| Fatigue                                                    | 4              | 0.49%                           | 0                 | 0.00%                              |
| Declined to participate                                    | 46             | 5.63%                           | 8                 | 9.52%                              |
| Technical or Logistical problems in test administration*** | 75             | 9.18%                           | 16                | 19.05%                             |
| Unknown                                                    | 40             | 4.90%                           | 4                 | 4.76%                              |
| <b>Total</b>                                               | <b>817</b>     | <b>100%</b>                     | <b>84</b>         | <b>100%</b>                        |

\*Testing was initiated and halted before completion when assessors realized participants were either symptomatic, or lacked computer skills needed to complete the assessment

\*\*Physical limitations included, but were not limited to, osteoarthritis, fibromyalgia, tremor, hand surgery, carpal tunnel, visual limitations

\*\*\*Problems include internet connectivity problems and lack of time

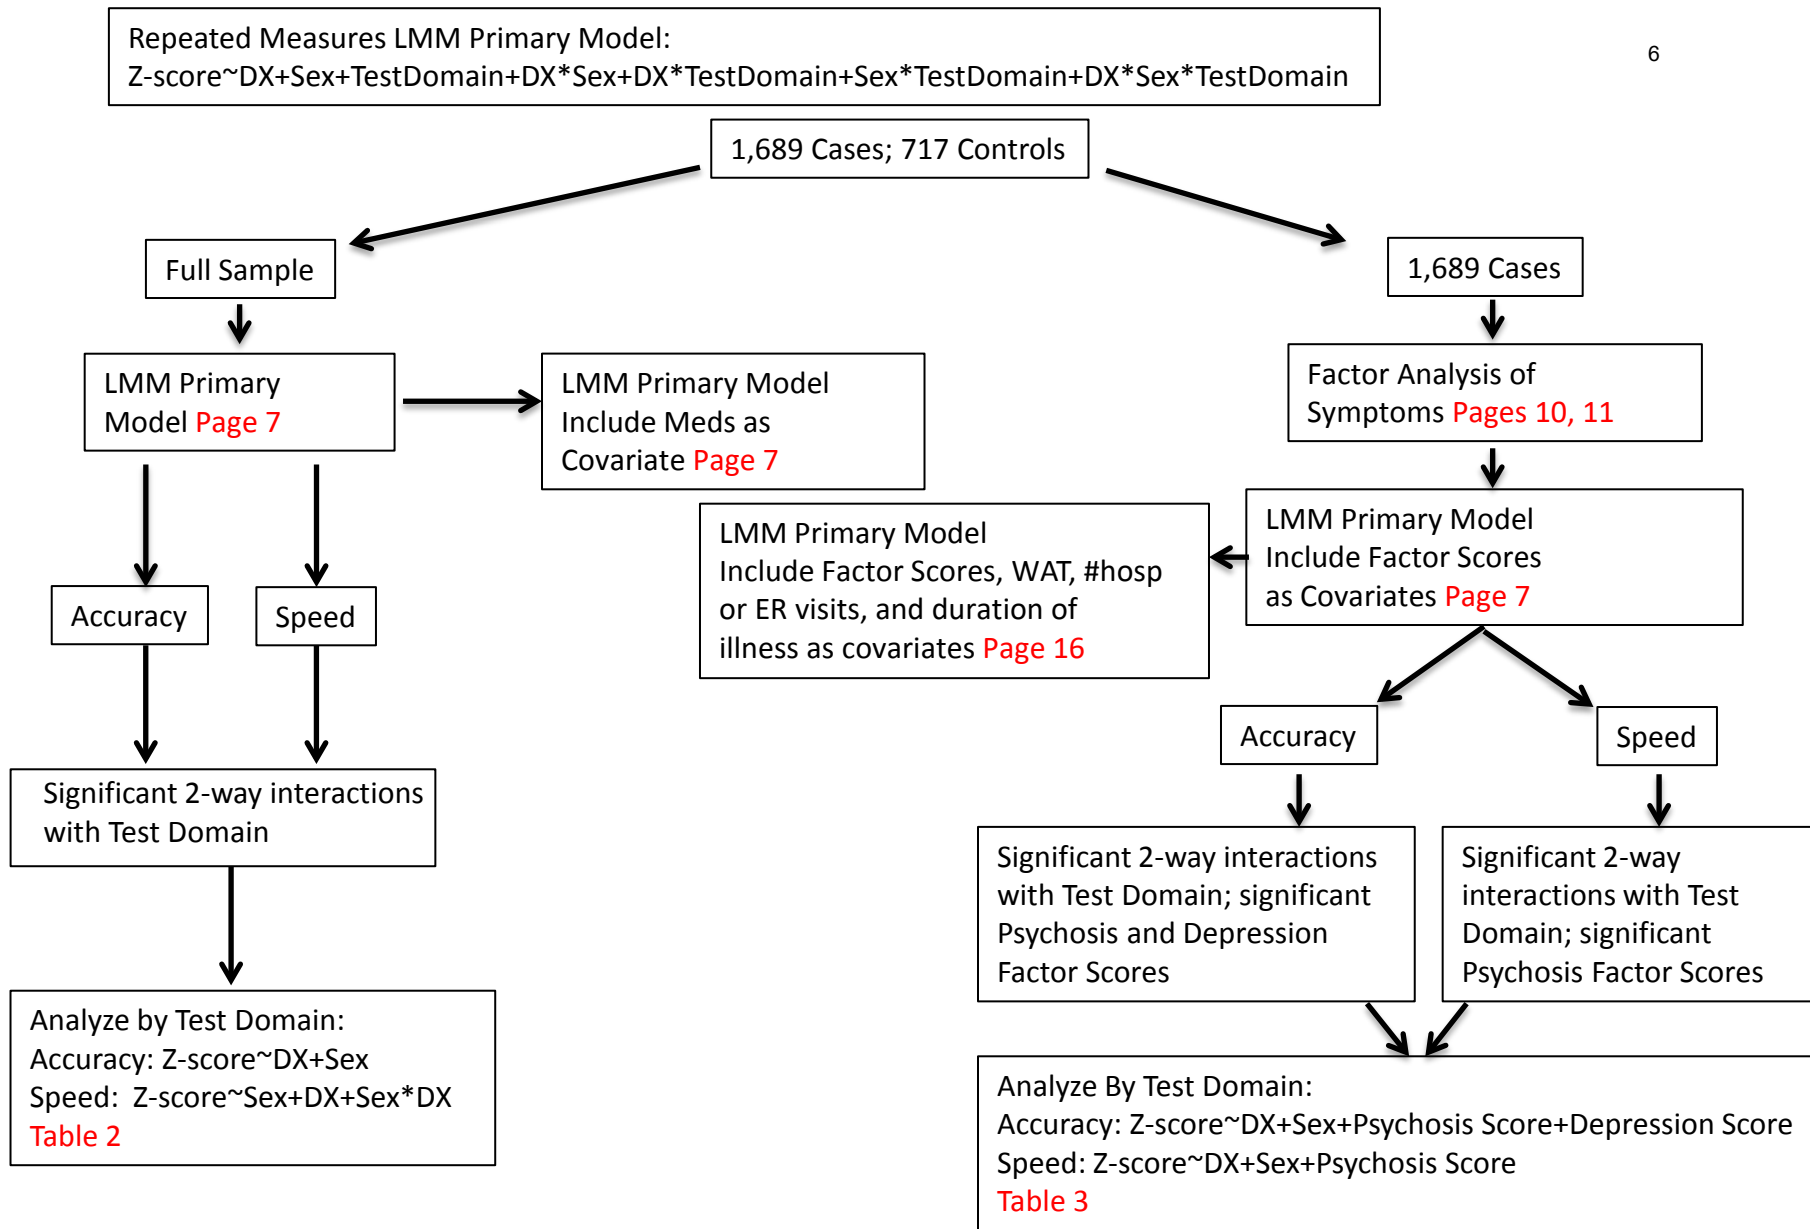

**Supplementary Figure 2. Schematic of linear mixed model analysis procedures and overview of results.** Page numbers refer to pages in the Appendix



**Supplementary Table 5A: Analysis of accuracy and speed as a function of diagnosis, sex, domain, and interactions among main effects.** The dependent variable in analyses are z-scores on either Accuracy or Speed, the different tests administered are repeated measures in the LMM. Reference category is control-females. DX=Diagnosis. Prior to analysis, CNB data were adjusted for age and education.

|               | Accuracy LMM N=2,406 |       |          |         | Speed LMM N=2,406 |       |          |         |
|---------------|----------------------|-------|----------|---------|-------------------|-------|----------|---------|
|               | numDF                | denDF | F-value  | p-value | numDF             | denDF | F-value  | p-value |
| (Intercept)   | 1                    | 15453 | 394.5662 | <.0001  | 1                 | 17761 | 300.4544 | <.0001  |
| DX            | 4                    | 2396  | 78.8939  | <.0001  | 4                 | 2396  | 68.28848 | <.0001  |
| Sex           | 1                    | 2396  | 1.4032   | 0.2363  | 1                 | 2396  | 4.70096  | 0.0302  |
| Domain        | 7                    | 15453 | 26.2324  | <.0001  | 8                 | 17761 | 50.46407 | <.0001  |
| DX:Sex        | 4                    | 2396  | 2.1516   | 0.0721  | 4                 | 2396  | 0.80256  | 0.5234  |
| DX:Domain     | 28                   | 15453 | 6.322    | <.0001  | 32                | 17761 | 13.19777 | <.0001  |
| Sex:Domain    | 7                    | 15453 | 9.937    | <.0001  | 8                 | 17761 | 13.54875 | <.0001  |
| DX:Sex:Domain | 28                   | 15453 | 1.1536   | 0.2627  | 32                | 17761 | 1.705    | 0.0078  |

**Supplementary Table 5B: Analysis of accuracy and speed as a function of diagnosis, sex, domain, interactions among these main effects, and medication use.** The dependent variable in analyses are z-scores on either Accuracy or Speed, the different tests administered are repeated measures in the LMM. Reference category is control-females. DX=Diagnosis. Prior to analysis, CNB data were adjusted for age and education.

|                     | Accuracy LMM N=2,406 |       |         |         | Speed LMM N=2,406 |       |         |         |
|---------------------|----------------------|-------|---------|---------|-------------------|-------|---------|---------|
|                     | numDF                | denDF | F-value | p-value | numDF             | denDF | F-value | p-value |
| (Intercept)         | 1                    | 15453 | 400.12  | <.0001  | 1                 | 17761 | 302.79  | <.0001  |
| DX                  | 4                    | 2393  | 80.06   | <.0001  | 4                 | 2393  | 68.84   | <.0001  |
| Sex                 | 1                    | 2393  | 1.43    | 0.2326  | 1                 | 2393  | 4.74    | 0.0296  |
| Domain              | 7                    | 15453 | 26.23   | <.0001  | 8                 | 17761 | 50.48   | <.0001  |
| On Antipsychotics   | 1                    | 2393  | 26.41   | <.0001  | 1                 | 2393  | 6.95    | 0.0084  |
| On Antidepressants  | 1                    | 2393  | 3.96    | 0.0466  | 1                 | 2393  | 9.94    | 0.0016  |
| On Mood Stabilizers | 1                    | 2393  | 9.79    | 0.0018  | 1                 | 2393  | 7.74    | 0.0054  |
| DX:Sex              | 4                    | 2393  | 1.94    | 0.1013  | 4                 | 2393  | 0.83    | 0.5089  |
| DX:Domain           | 28                   | 15453 | 6.32    | <.0001  | 32                | 17761 | 13.19   | <.0001  |
| Sex:Domain          | 7                    | 15453 | 9.93    | <.0001  | 8                 | 17761 | 13.53   | <.0001  |
| DX:Sex:Domain       | 28                   | 15453 | 1.14    | 0.2734  | 32                | 17761 | 1.70    | 0.0079  |

**Supplementary Table 5C: Analysis of accuracy and speed as a function of diagnosis, sex, domain, interactions among these main effects, and scores on three symptom factors.** The dependent variable in analyses are z-scores on either Accuracy or Speed, the different tests administered are repeated measures in the LMM. DX=Diagnosis. Prior to analysis, CNB data were adjusted for age and education.

|               | Accuracy LMM N=1,689 |       |           |         | Speed LMM N=1,689 |       |           |         |
|---------------|----------------------|-------|-----------|---------|-------------------|-------|-----------|---------|
|               | numDF                | denDF | F-value   | p-value | numDF             | denDF | F-value   | p-value |
| DX            | 4                    | 1678  | 157.90217 | <.0001  | 4                 | 1678  | 123.57637 | <.0001  |
| Sex           | 1                    | 1678  | 0.33674   | 0.5618  | 1                 | 1678  | 5.01489   | 0.0253  |
| Domain        | 7                    | 10623 | 35.47571  | <.0001  | 8                 | 12232 | 66.37686  | <.0001  |
| Psychosis     | 1                    | 1678  | 20.90826  | <.0001  | 1                 | 1678  | 19.917    | <.0001  |
| Mania         | 1                    | 1678  | 4.65409   | 0.0311  | 1                 | 1678  | 1.31302   | 0.252   |
| Depression    | 1                    | 1678  | 10.54576  | 0.0012  | 1                 | 1678  | 2.22876   | 0.1357  |
| DX:Sex        | 3                    | 1678  | 0.31288   | 0.8161  | 3                 | 1678  | 0.66007   | 0.5766  |
| DX:Domain     | 21                   | 10623 | 4.16805   | <.0001  | 24                | 12232 | 8.63453   | <.0001  |
| Sex:Domain    | 7                    | 10623 | 7.54731   | <.0001  | 8                 | 12232 | 10.11055  | <.0001  |
| DX:Sex:Domain | 21                   | 10623 | 1.05686   | 0.3886  | 24                | 12232 | 1.39371   | 0.0953  |

## Accuracy

Diagnosis SCZ BP-I BP-II MDD Control

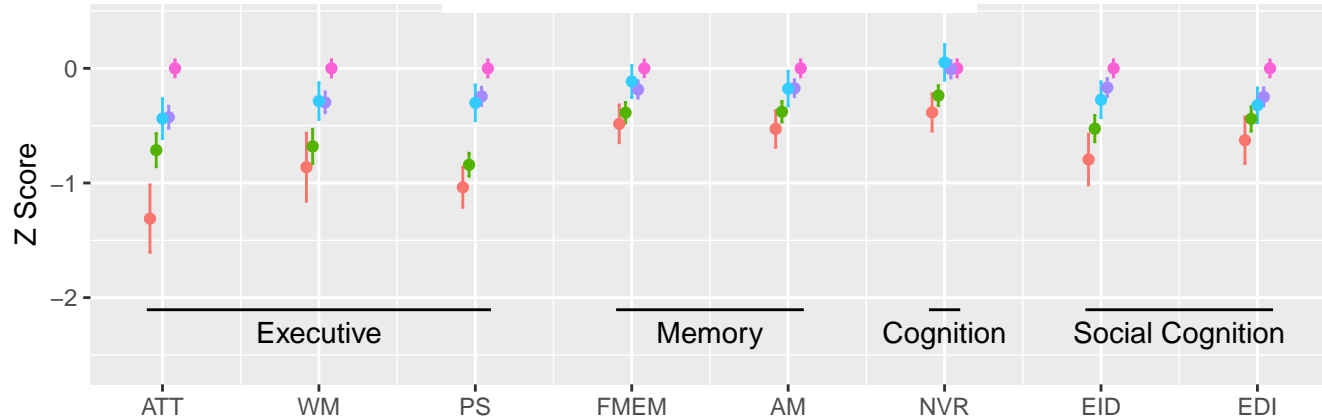

## Speed

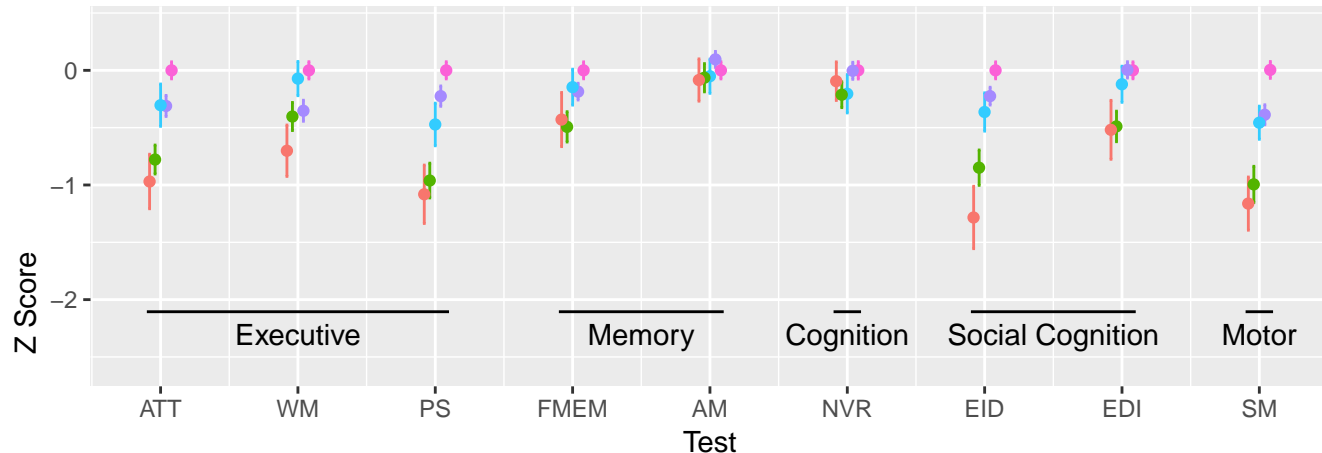

**Supplementary Figure 3. Z-scores on Accuracy (top) and Speed (bottom) profiles for tests assessing Executive Function, Memory, (Complex) Cognition, Social Cognition, and Motor Speed.** Data for Speed were multiplied by -1 so that poorer performance (slower speed), would result in a lower value. Z-scores were generated relative to Controls (n=717). SCZ: schizophrenia (n=160) BP-I: bipolar disorder I (n=519), BP-II: bipolar disorder II (n=204), MDD: major depressive disorder (n=806). Test abbreviations: ATT = Continuous Performance Test; WM = Letter-N-Back test; PS = Digit Symbol Test, matching trials; FMEM = Face Memory test; AM = Digit Symbol test, recall trials; NVR = Matrix Analysis test; EID = Emotion Recognition test; EDI = Measured Emotion Differentiation test; SM = Motor Praxis test. Error bars are the 95% confidence intervals.

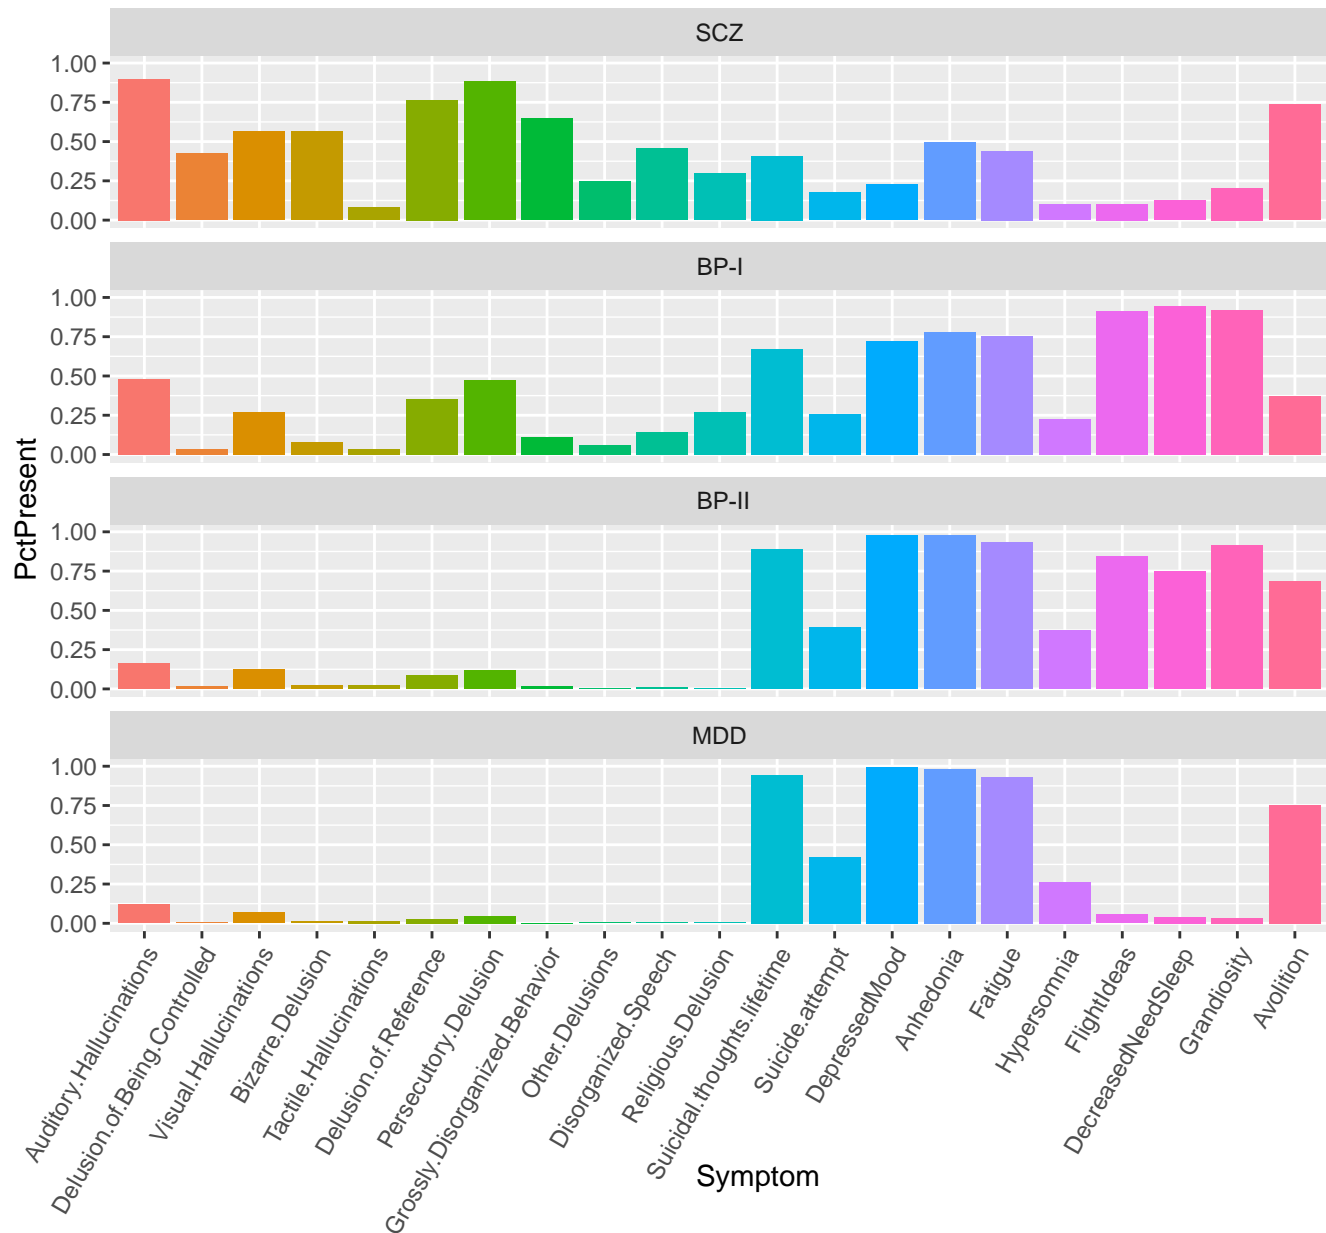

**Supplementary Figure 4. Symptom endorsement by diagnosis for 21 binary symptoms endorsed by at least 2.5% of cases overall.** SCZ: schizophrenia (n=160) BP-I: bipolar disorder I (n=519), BP-II: bipolar disorder II (n=204), MDD: major depressive disorder (n=806).

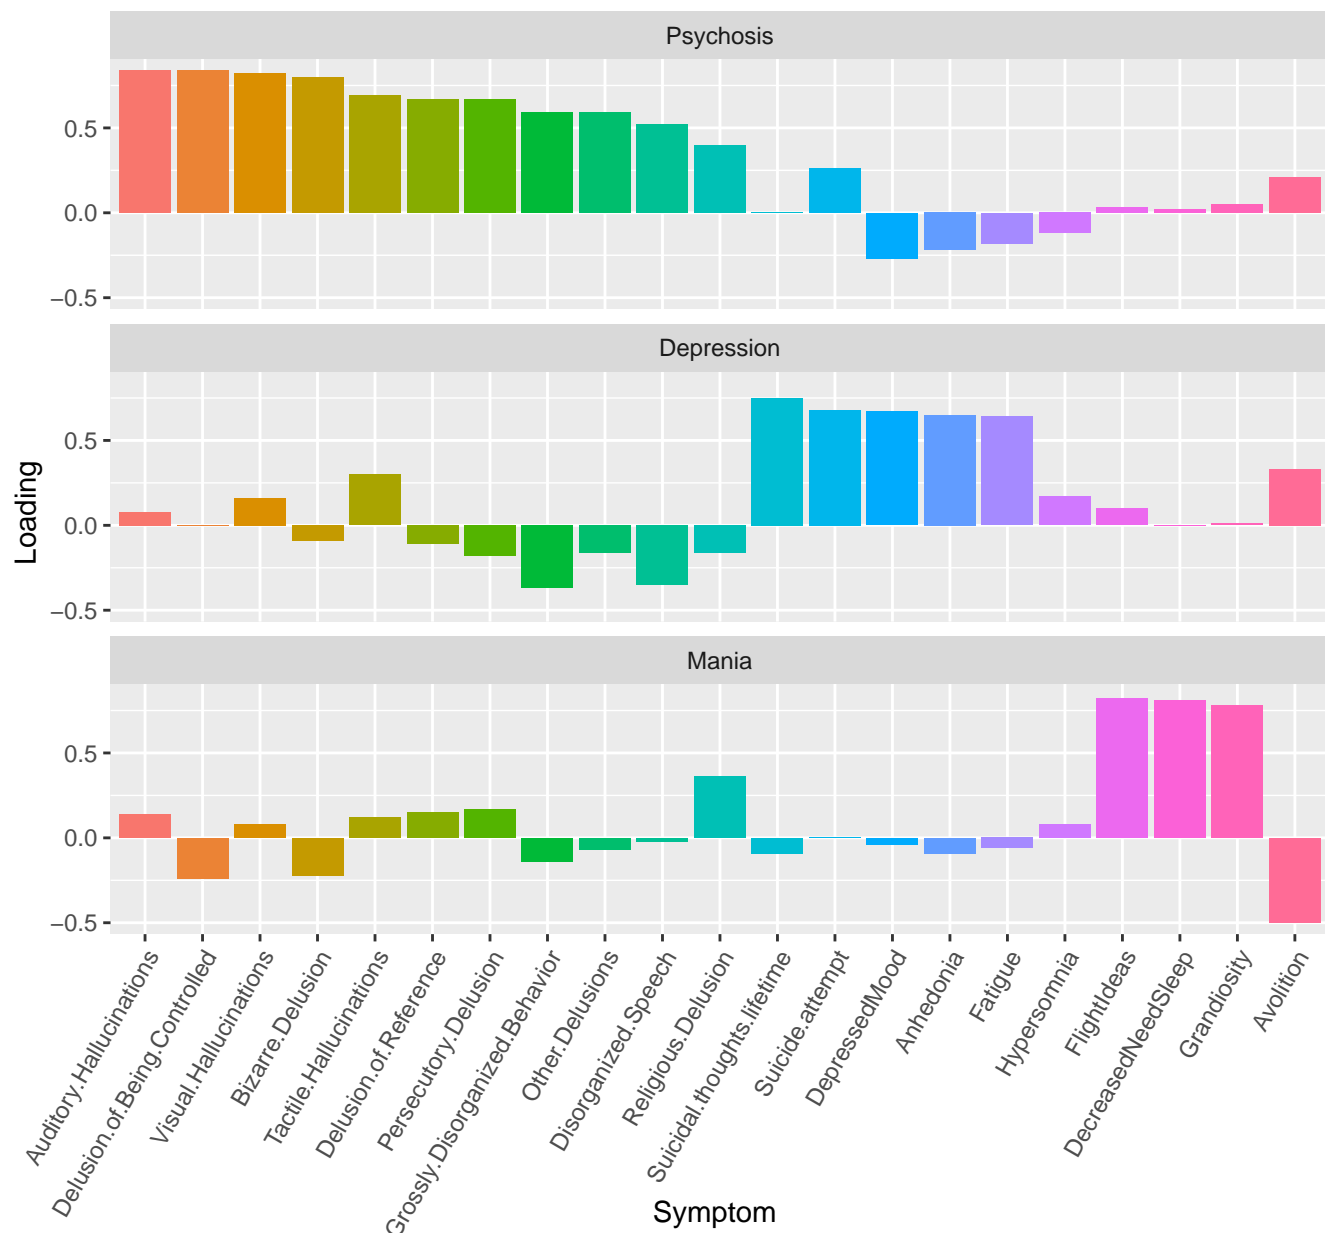

Supplementary Figure 5. Factor loadings on 21 binary symptoms in the three-factor model.

**Supplementary Table 6. "Uni" is the uniqueness for each symptom from the 3-factor solution.** Factor correlations are presented below the loadings

| Symptom                       | Uni  |
|-------------------------------|------|
| Auditory Hallucinations       | 0.29 |
| Delusion of Being Controlled  | 0.36 |
| Visual Hallucinations         | 0.42 |
| Bizarre Delusion              | 0.33 |
| Tactile Hallucinations        | 0.66 |
| Delusion of Reference         | 0.36 |
| Persecutory Delusion          | 0.26 |
| Grossly Disorganized Behavior | 0.31 |
| Other Delusions               | 0.54 |
| Disorganized Speech           | 0.4  |
| Religious Delusion            | 0.5  |
| Suicidal thoughts lifetime    | 0.38 |
| Suicide attempt               | 0.68 |
| Depressed Mood                | 0.24 |
| Anhedonia                     | 0.3  |
| Fatigue                       | 0.38 |
| Hypersomnia                   | 0.94 |
| Flight of Ideas               | 0.37 |
| Decreased Need for Sleep      | 0.33 |
| Grandiosity                   | 0.37 |
| Avolition                     | 0.62 |

**Correlations among factors**

|            | Psychosis | Depression | Mania |
|------------|-----------|------------|-------|
| Psychosis  | 1         | -0.61      | 0.28  |
| Depression | -0.61     | 1.0        | -0.35 |
| Mania      | 0.28      | -0.35      | 1     |

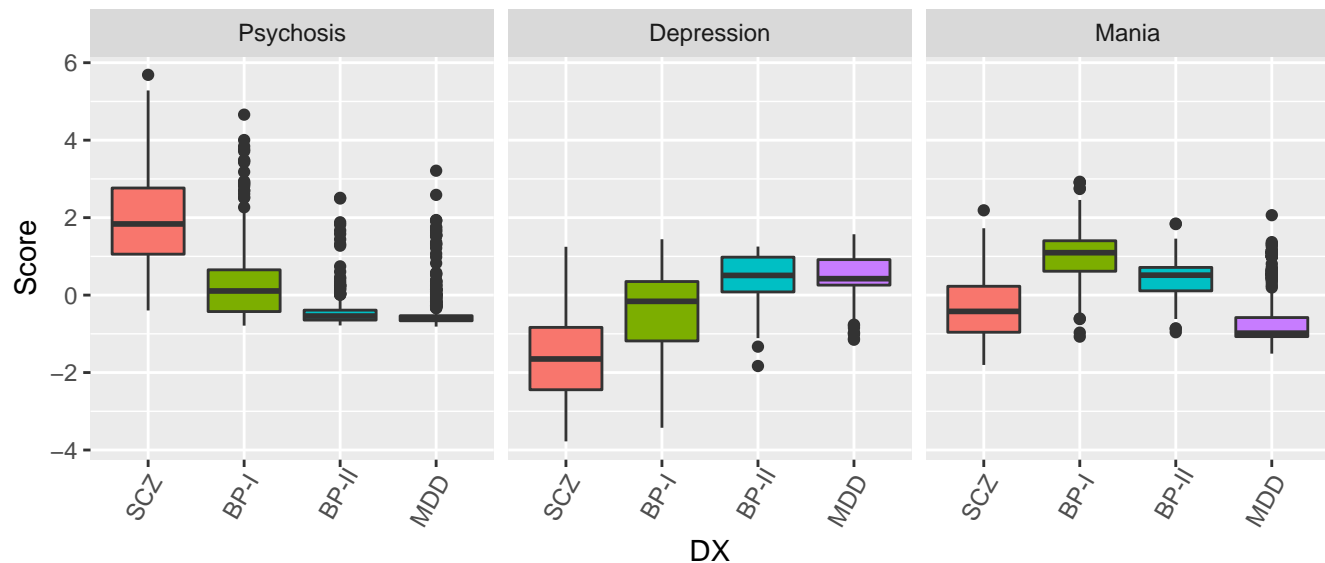

**Supplementary Figure 6. Distribution of scores on factors, by diagnosis.** SCZ: schizophrenia (n=160) BP-I: bipolar disorder I (n=519), BP-II: bipolar disorder II (n=204), MDD: major depressive disorder (n=806).

**Supplementary Table 7. Comparison of regression coefficients for Psychosis and Depression factor scores in imputed and non-imputed symptom data.** Results are presented for CNB tests that are most significant in Table 3.

| Measure  | Test | Factor     | Coefficient in imputed data | Coefficient with no imputation |
|----------|------|------------|-----------------------------|--------------------------------|
| Accuracy | ATT  | Psychosis  | -0.159                      | -0.033                         |
| Accuracy | PS   | Psychosis  | -0.158                      | -0.181                         |
| Accuracy | EID  | Depression | 0.239                       | 0.234                          |
| Speed    | ATT  | Psychosis  | -0.126                      | -0.111                         |
| Speed    | PS   | Psychosis  | -0.154                      | -0.199                         |
| Speed    | EDI  | Psychosis  | -0.176                      | -0.176                         |
| Speed    | SM   | Psychosis  | -0.243                      | -0.201                         |

**Supplementary Table 8. Analyses by diagnosis, split by median score on Psychosis or Depression, for CNB tests that are most significant in Table 3.**

| Measure  | Test | Factor     | DX  | Bottom half of Factor Score |      |     | Top Half of Factor Score |      |     |
|----------|------|------------|-----|-----------------------------|------|-----|--------------------------|------|-----|
|          |      |            |     | mean                        | sd   | N   | mean                     | sd   | N   |
| Accuracy | ATT  | Psychosis  | BP1 | -0.47                       | 1.45 | 97  | -0.78                    | 1.63 | 373 |
| Accuracy | ATT  | Psychosis  | BP2 | -0.20                       | 0.87 | 103 | -0.72                    | 1.48 | 85  |
| Accuracy | ATT  | Psychosis  | MDD | -0.39                       | 1.32 | 597 | -0.55                    | 1.42 | 132 |
| Accuracy | PS   | Psychosis  | BP1 | -0.34                       | 1.00 | 93  | -0.98                    | 1.07 | 353 |
| Accuracy | PS   | Psychosis  | BP2 | -0.20                       | 0.97 | 102 | -0.42                    | 1.19 | 82  |
| Accuracy | PS   | Psychosis  | MDD | -0.19                       | 1.07 | 587 | -0.46                    | 1.12 | 136 |
| Speed    | ATT  | Psychosis  | BP1 | -0.45                       | 1.42 | 97  | -0.85                    | 1.37 | 373 |
| Speed    | ATT  | Psychosis  | BP2 | -0.24                       | 1.12 | 103 | -0.41                    | 1.45 | 85  |
| Speed    | ATT  | Psychosis  | MDD | -0.29                       | 1.27 | 597 | -0.50                    | 1.21 | 132 |
| Speed    | PS   | Psychosis  | BP1 | -0.37                       | 1.43 | 93  | -1.13                    | 1.65 | 353 |
| Speed    | PS   | Psychosis  | BP2 | -0.39                       | 1.25 | 102 | -0.56                    | 1.33 | 82  |
| Speed    | PS   | Psychosis  | MDD | -0.19                       | 1.19 | 587 | -0.34                    | 1.35 | 136 |
| Speed    | EDI  | Psychosis  | BP1 | 0.02                        | 1.17 | 98  | -0.63                    | 1.55 | 397 |
| Speed    | EDI  | Psychosis  | BP2 | 0.04                        | 0.94 | 108 | -0.27                    | 1.28 | 90  |
| Speed    | EDI  | Psychosis  | MDD | 0.04                        | 0.98 | 635 | -0.04                    | 1.14 | 157 |
| Speed    | SM   | Psychosis  | BP1 | -0.35                       | 1.46 | 99  | -1.14                    | 1.84 | 402 |
| Speed    | SM   | Psychosis  | BP2 | -0.44                       | 0.94 | 108 | -0.50                    | 1.16 | 92  |
| Speed    | SM   | Psychosis  | MDD | -0.32                       | 1.08 | 634 | -0.71                    | 1.72 | 157 |
| Accuracy | EID  | Depression | SCZ | -1.04                       | 1.43 | 142 | 0.06                     | 0.84 | 11  |
| Accuracy | EID  | Depression | BP1 | -0.71                       | 1.40 | 339 | -0.20                    | 1.05 | 152 |
| Accuracy | EID  | Depression | BP2 | -0.50                       | 1.37 | 65  | -0.12                    | 0.99 | 131 |
| Accuracy | EID  | Depression | MDD | -0.18                       | 1.21 | 352 | -0.11                    | 1.09 | 426 |



**Supplementary Table 9. Relationship between WAT, quantile-normal transformed number of hospitalizations and ER visits, or SA45 global severity index, duration of illness (in years since first visit), and Factor Scores or DX.** In models with Diagnosis, MDD is the reference.

|                                     | WAT      |        |         |          | number of hospitalizations and ER visits |          |         |            | Duration illness |         |        |          | SA45 severity |       |        |          |
|-------------------------------------|----------|--------|---------|----------|------------------------------------------|----------|---------|------------|------------------|---------|--------|----------|---------------|-------|--------|----------|
|                                     | Estimate | SE     | t       | Pr(> t ) | Estimate                                 | SE       | t       | Pr(> t )   | Estimate         | SE      | t      | Pr(> t ) | Estimate      | SE    | t      | Pr(> t ) |
| <b>A) factor scores</b>             |          |        |         |          |                                          |          |         |            |                  |         |        |          |               |       |        |          |
| (Intercept)                         | 30.429   | 0.2135 | 142.538 | <2e-16   | 0.05231                                  | 0.02368  | 2.209   | 2.73E-02   | 6.34668          | 0.11629 | 54.575 | <2e-16   | 43.234        | 1.017 | 42.531 | <2e-16   |
| Psychosis                           | -1.3073  | 0.2696 | -4.849  | 1.35E-06 | 0.25157                                  | 0.03189  | 7.889   | 6.25E-15   | 0.99736          | 0.15647 | 6.374  | 2.52E-10 | 5.705         | 1.349 | 4.23   | 2.50E-05 |
| Mania                               | 0.5754   | 0.229  | 2.512   | 0.0121   | 0.30121                                  | 0.0257   | 11.718  | <2e-16     | 1.37357          | 0.12626 | 10.879 | <2e-16   | -6.246        | 1.096 | -5.701 | 1.48E-08 |
| Depression                          | 0.5742   | 0.2772 | 2.071   | 0.0385   | 0.05217                                  | 0.03177  | 1.642   | 0.1009     | 0.05494          | 0.15602 | 0.352  | 0.725    | 11.572        | 1.356 | 8.536  | <2e-16   |
| <b>B) diagnosis + factor scores</b> |          |        |         |          |                                          |          |         |            |                  |         |        |          |               |       |        |          |
| (Intercept)                         | 31.0897  | 0.4213 | 73.79   | <2e-16   | -0.210647                                | 0.047679 | -4.418  | 1.08E-05   | 5.1043           | 0.2374  | 21.499 | <2e-16   | 49.697        | 2.058 | 24.153 | <2e-16   |
| BP-II                               | -0.5601  | 0.829  | -0.676  | 0.49937  | -0.004765                                | 0.092057 | -0.052  | 0.95873    | 0.6843           | 0.4582  | 1.494  | 0.135522 | 6.722         | 3.999 | 1.681  | 0.093    |
| BP-I                                | -1.8966  | 0.831  | -2.282  | 0.02259  | 0.579821                                 | 0.095522 | 6.07    | 1.66E-09   | 2.9819           | 0.4759  | 6.266  | 4.98E-10 | -17.231       | 4.107 | -4.196 | 2.91E-05 |
| SCZ                                 | -0.1169  | 1.1137 | -0.105  | 0.91643  | 0.984789                                 | 0.127171 | 7.744   | 1.88E-14   | 2.5442           | 0.6333  | 4.017  | 6.21E-05 | -22.487       | 5.446 | -4.129 | 3.88E-05 |
| Psychosis                           | -1.3238  | 0.3186 | -4.155  | 3.41E-05 | 0.101732                                 | 0.03639  | 2.796   | 5.25E-03   | 0.6283           | 0.1812  | 3.467  | 5.42E-04 | 9.249         | 1.55  | 5.966  | 3.15E-09 |
| Mania                               | 1.2337   | 0.3845 | 3.209   | 0.00136  | 0.214045                                 | 0.045863 | 4.667   | 0.00000336 | 0.5841           | 0.2283  | 2.558  | 0.010631 | -3.596        | 1.964 | -1.831 | 0.0674   |
| Depression                          | 0.5769   | 0.2993 | 1.928   | 0.05406  | 0.141784                                 | 0.0334   | 4.245   | 2.33E-05   | 0.2416           | 0.1665  | 1.451  | 0.146941 | 9.047         | 1.443 | 6.269  | 4.98E-10 |
| <b>C) diagnosis</b>                 |          |        |         |          |                                          |          |         |            |                  |         |        |          |               |       |        |          |
| (Intercept)                         | 31.0598  | 0.3111 | 99.823  | <2e-16   | -0.36988                                 | 0.03242  | -11.408 | <2e-16     | 4.4381           | 0.1606  | 27.628 | <2e-16   | 52.478        | 1.446 | 36.279 | <2e-16   |
| BP-II                               | 0.7932   | 0.6913 | 1.147   | 0.2514   | 0.27823                                  | 0.07254  | 3.835   | 1.31E-04   | 1.4979           | 0.359   | 4.173  | 3.21E-05 | 2.994         | 3.234 | 0.926  | 0.355    |
| BP-I                                | -1.1567  | 0.4975 | -2.325  | 0.0202   | 0.94207                                  | 0.05393  | 17.468  | <2e-16     | 4.3634           | 0.2674  | 16.319 | <2e-16   | -24.303       | 2.362 | -10.29 | <2e-16   |
| SCZ                                 | -3.934   | 0.7653 | -5.14   | 3.07E-07 | 1.00805                                  | 0.08879  | 11.353  | 0.915      | 3.7505           | 0.4394  | 8.536  | <2e-16   | -20.458       | 3.87  | -5.287 | 1.47E-07 |

**Supplementary Table 10A: Analysis of accuracy and speed as a function of diagnosis, sex, domain, interactions among these main effects, scores on three symptom factors and score on the WAT.** The dependent variable in analyses are z-scores on either Accuracy or Speed, the different tests administered are repeated measures in the LMM. DX=Diagnosis. Prior to analysis, CNB data were adjusted for age.

|               | Accuracy LMM N=1,682 |       |         |         | Speed LMM N=1,682 |       |         |         |
|---------------|----------------------|-------|---------|---------|-------------------|-------|---------|---------|
|               | numDF                | denDF | F-value | p-value | numDF             | denDF | F-value | p-value |
| DX            | 4                    | 1670  | 202.35  | <.0001  | 4                 | 1670  | 114.68  | <.0001  |
| Sex           | 1                    | 1670  | 0.00    | 0.9938  | 1                 | 1670  | 9.00    | 0.0027  |
| Domain        | 7                    | 10595 | 32.26   | <.0001  | 8                 | 12197 | 48.43   | <.0001  |
| wat_total     | 1                    | 1670  | 856.92  | <.0001  | 1                 | 1670  | 334.03  | <.0001  |
| Psychosis     | 1                    | 1670  | 13.89   | 0.0002  | 1                 | 1670  | 15.33   | 0.0001  |
| Mania         | 1                    | 1670  | 0.54    | 0.4627  | 1                 | 1670  | 4.66    | 0.031   |
| Depression    | 1                    | 1670  | 4.85    | 0.0278  | 1                 | 1670  | 0.52    | 0.47    |
| DX:Sex        | 3                    | 1670  | 0.31    | 0.8195  | 3                 | 1670  | 1.42    | 0.234   |
| DX:Domain     | 21                   | 10595 | 4.19    | <.0001  | 24                | 12197 | 9.88    | <.0001  |
| Sex:Domain    | 7                    | 10595 | 7.55    | <.0001  | 8                 | 12197 | 9.31    | <.0001  |
| DX:Sex:Domain | 21                   | 10595 | 1.03    | 0.4214  | 24                | 12197 | 1.46    | 0.0669  |

**Supplementary Table 10B: Analysis of accuracy and speed as a function of diagnosis, sex, domain, interactions among these main effects, scores on three symptom factors, duration of illness, current symptom severity from the SA45, and number of hospitalizations and ER visits recorded in the electronic medical record.** The dependent variable in analyses are z-scores on either Accuracy or Speed, the different tests administered are repeated measures in the LMM. DX=Diagnosis. Prior to analysis, CNB data were adjusted for age and education. Number of visits was quantile-normal transformed prior to analysis.

|                       | Accuracy LMM N=1,330 |       |         |         | Speed LMM N=1,330 |       |         |         |
|-----------------------|----------------------|-------|---------|---------|-------------------|-------|---------|---------|
|                       | numDF                | denDF | F-value | p-value | numDF             | denDF | F-value | p-value |
| DX                    | 4                    | 1259  | 137.63  | <.0001  | 4                 | 1259  | 92.16   | <.0001  |
| Sex                   | 1                    | 1259  | 0.11    | 0.7458  | 1                 | 1259  | 4.05    | 0.0444  |
| Domain                | 7                    | 7830  | 27.68   | <.0001  | 8                 | 9034  | 51.09   | <.0001  |
| Number of visits      | 1                    | 1259  | 0.36    | 0.547   | 1                 | 1259  | 2.14    | 0.1438  |
| SA45 symptom severity | 1                    | 1259  | 3.56    | 0.0594  | 1                 | 1259  | 4.67    | 0.031   |
| Duration of illness   | 1                    | 1259  | 0.05    | 0.821   | 1                 | 1259  | 3.34    | 0.0677  |
| Psychosis             | 1                    | 1259  | 13.71   | 0.0002  | 1                 | 1259  | 23.49   | <.0001  |
| Mania                 | 1                    | 1259  | 0.39    | 0.5306  | 1                 | 1259  | 1.46    | 0.2271  |
| Depression            | 1                    | 1259  | 7.28    | 0.0071  | 1                 | 1259  | 5.74    | 0.0167  |
| DX:Sex                | 3                    | 1259  | 0.35    | 0.7876  | 3                 | 1259  | 0.11    | 0.9558  |
| DX:Domain             | 21                   | 7830  | 3.77    | <.0001  | 24                | 9034  | 6.71    | <.0001  |
| Sex:Domain            | 7                    | 7830  | 4.87    | <.0001  | 8                 | 9034  | 8.63    | <.0001  |
| DX:Sex:Domain         | 21                   | 7830  | 1.35    | 0.1335  | 24                | 9034  | 1.94    | 0.0039  |

## Accuracy

Low Psychosis High Psychosis

17

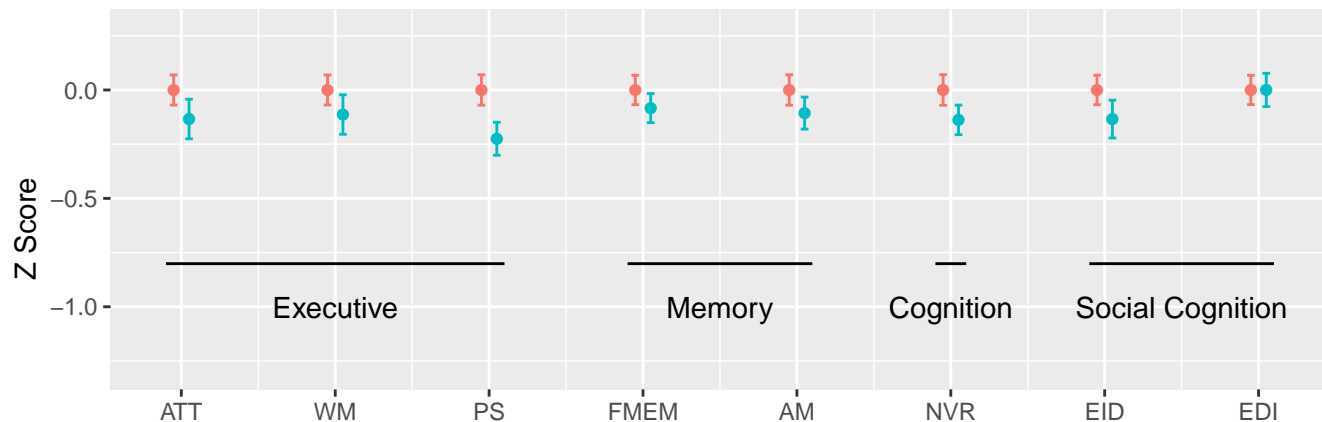

## Speed

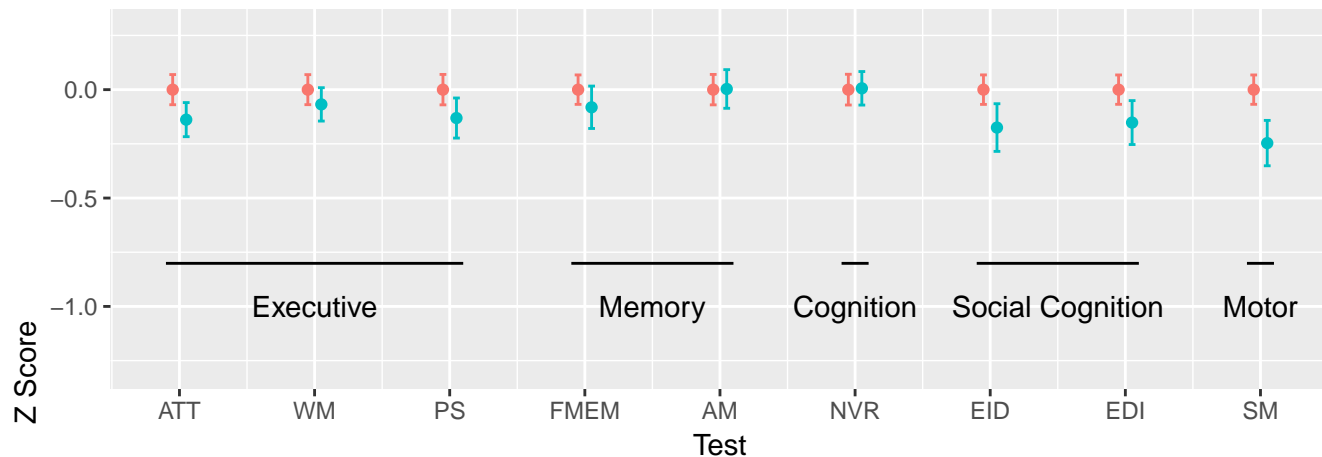

**Supplementary Figure 7. Z-scores on Accuracy (top) and Speed (bottom) profiles for tests assessing Executive Function, Memory, (Complex) Cognition, Social Cognition, and Motor Speed, stratified by Psychosis factor scores.** Data for speed were multiplied by -1 so that poorer performance (slower speed), would result in a lower value. In order to focus on the effect of Psychosis factor score, diagnosis was regressed out of raw test data, and severe mental illness cases were categorized as being above or below the median on the Psychosis factor score. Z-scores were generated relative to the low Psychosis group. Test abbreviations are as in Supplementary Figure 3, page 8. High Psychosis=severe mental illness cases with Psychosis factor scores above the median (n=831); Low Psychosis=severe mental illness cases with Psychosis factor score below the median (n=858). Error bars are the 95% confidence intervals. The number of subjects in each Psychosis group, by diagnosis, is presented in Table 1.

### Accuracy

Low Depression High Depression

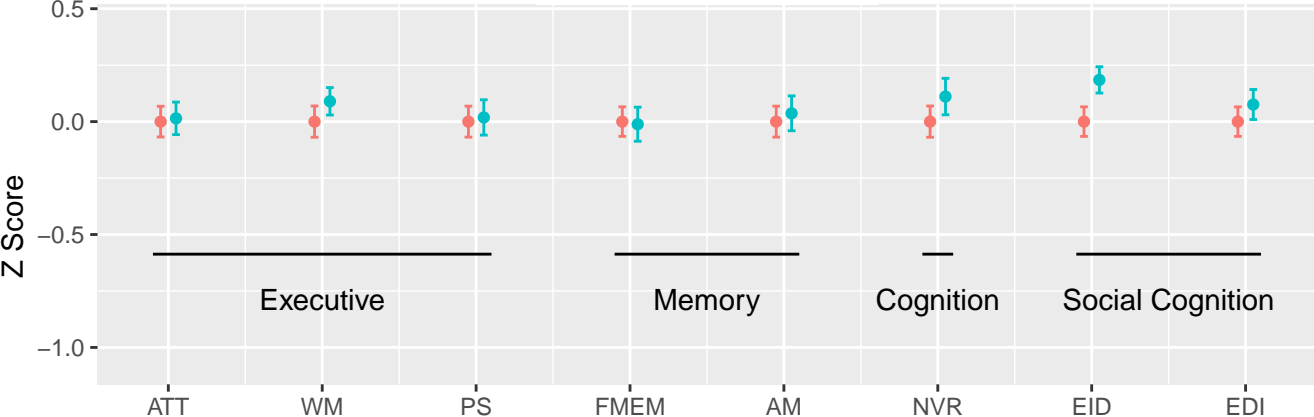

### Speed

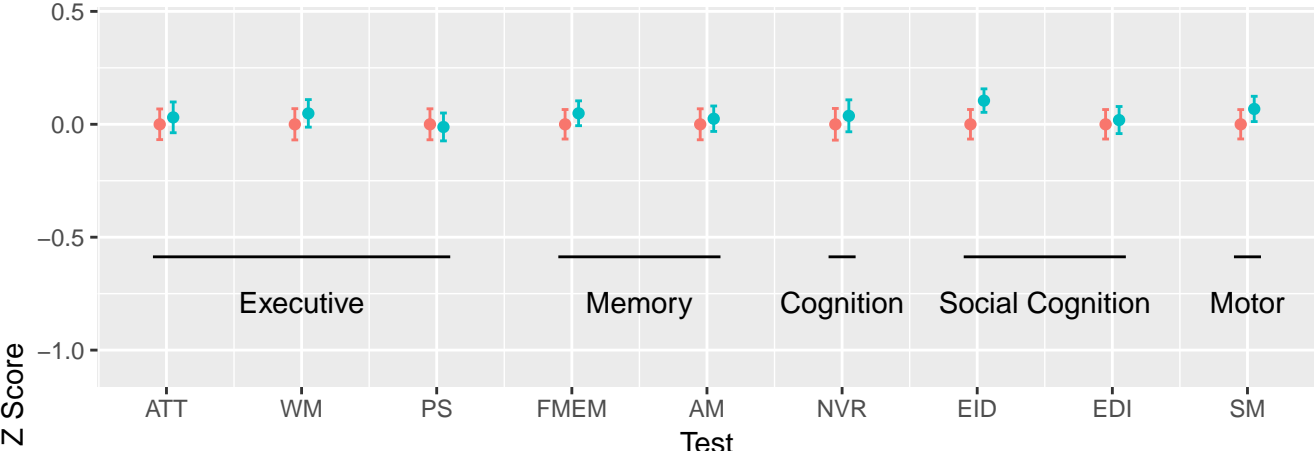

**Supplementary Figure 8. Z-scores on Accuracy (top) and Speed (bottom) profiles for tests assessing Executive Function, Memory, (Complex) Cognition, Social Cognition, and Motor Speed, stratified by Depression factor scores.** Data for speed were multiplied by -1 so that poorer performance (slower speed), would result in a lower value. In order to focus on the effect of Depression factor score, diagnosis and sex were regressed out of raw test data, and severe mental illness cases were categorized as being above or below the median on the Depression factor score. Z-scores were generated relative to the low Depression group. Test abbreviations are as on Supplementary Figure 3, page 8. High Depression=severe mental illness cases with Depression factor scores above the median (n=752); Low Depression=severe mental illness cases with Depression factor score below the median (n=937). Error bars are the 95% confidence intervals. The number of subjects in each Depression group, by diagnosis, is presented in Table 1.
